# Supplementary material for: Syntheses, crystal and molecular structures, and properties of some new phenylmercury(ii) dithiolate complexes
Source: Royal Society of Chemistry journal article supplement (doi:10.1039/b804635b), 2008-01-01
Supplement: b804635b.pdf [file b804635b.pdf]

**ELECTRON SUPPLEMENTARY INFORMATION FOR**  
Synthesis, crystal, molecular structure and properties of some new  
phenylmercury(II) dithiolate complexes

**Nanhai Singh,<sup>\*a</sup> Abhinav Kumar,<sup>a</sup> Kieran C. Molloy,<sup>b</sup> and Mary F. Mahon<sup>b</sup>**

<sup>a</sup>*Department of Chemistry, Faculty of Science, Banaras Hindu University, Varanasi 221005, India.* <sup>b</sup>*Department of Chemistry, University of Bath, Bath BA2 7AY, UK.*

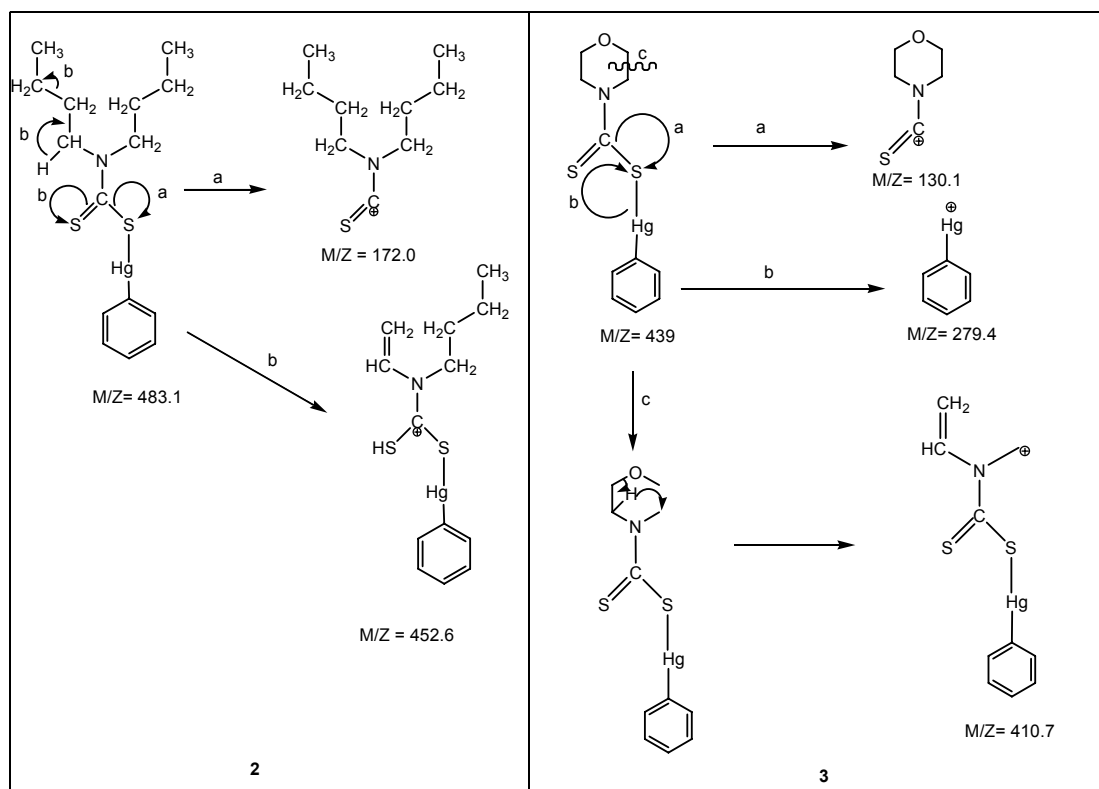

**Scheme S1.** Fragmentation pattern for **2** (left) and **3** (right)

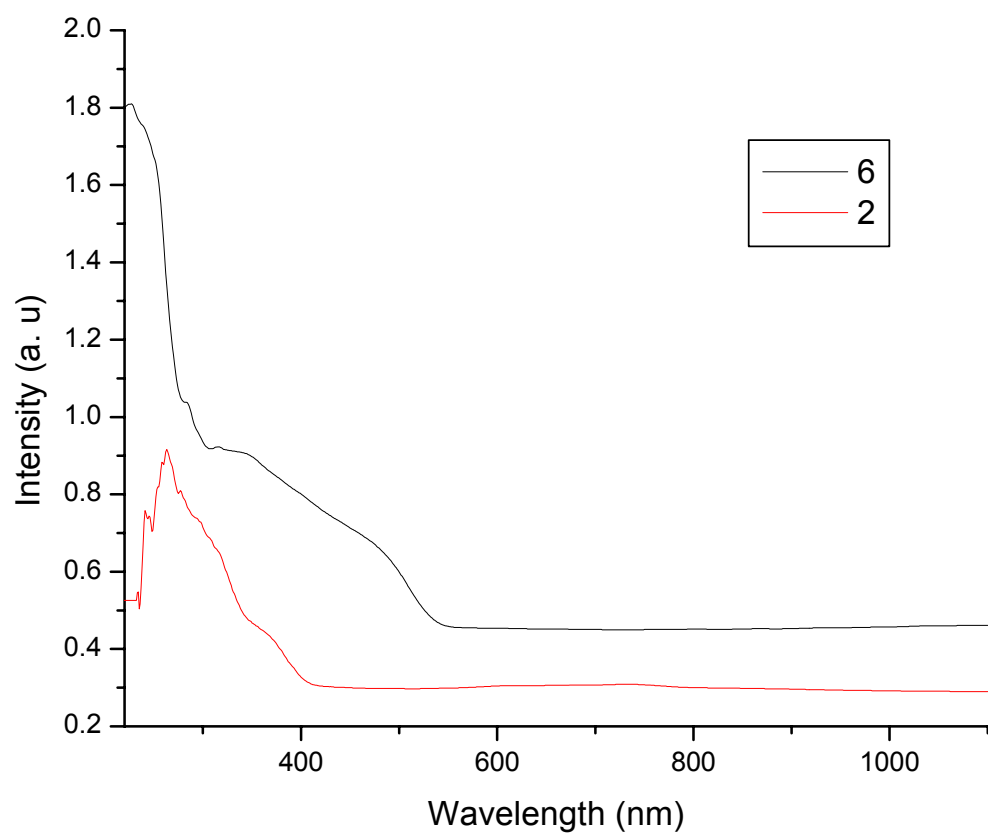

**Fig S1.** Solid state electronic spectra for **2** and **6**.

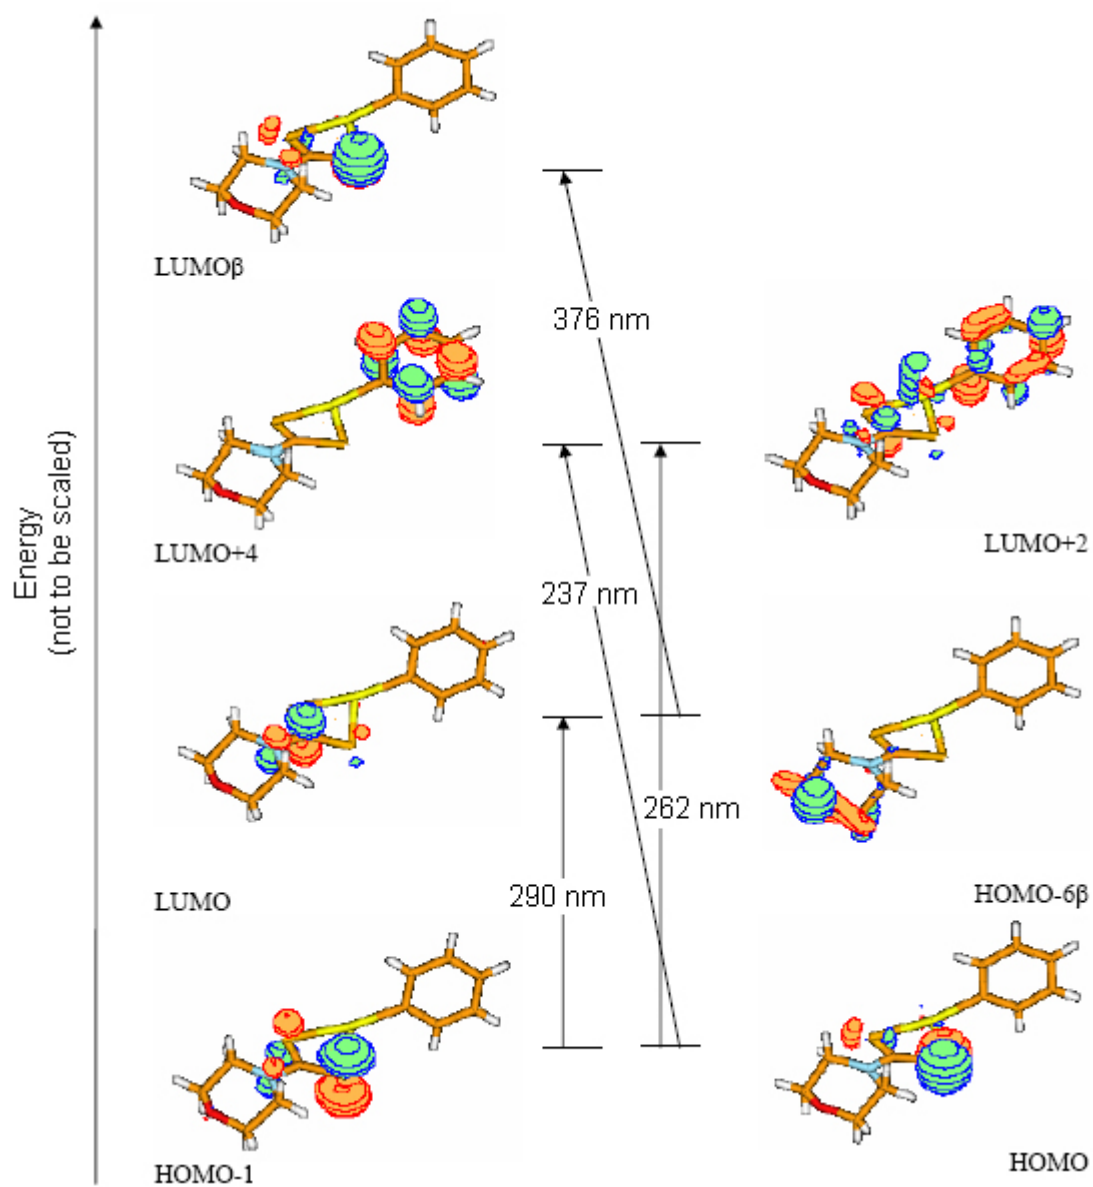

**Fig S2.** Selected orbital transitions for **2** (orbital counter values are 0.05).

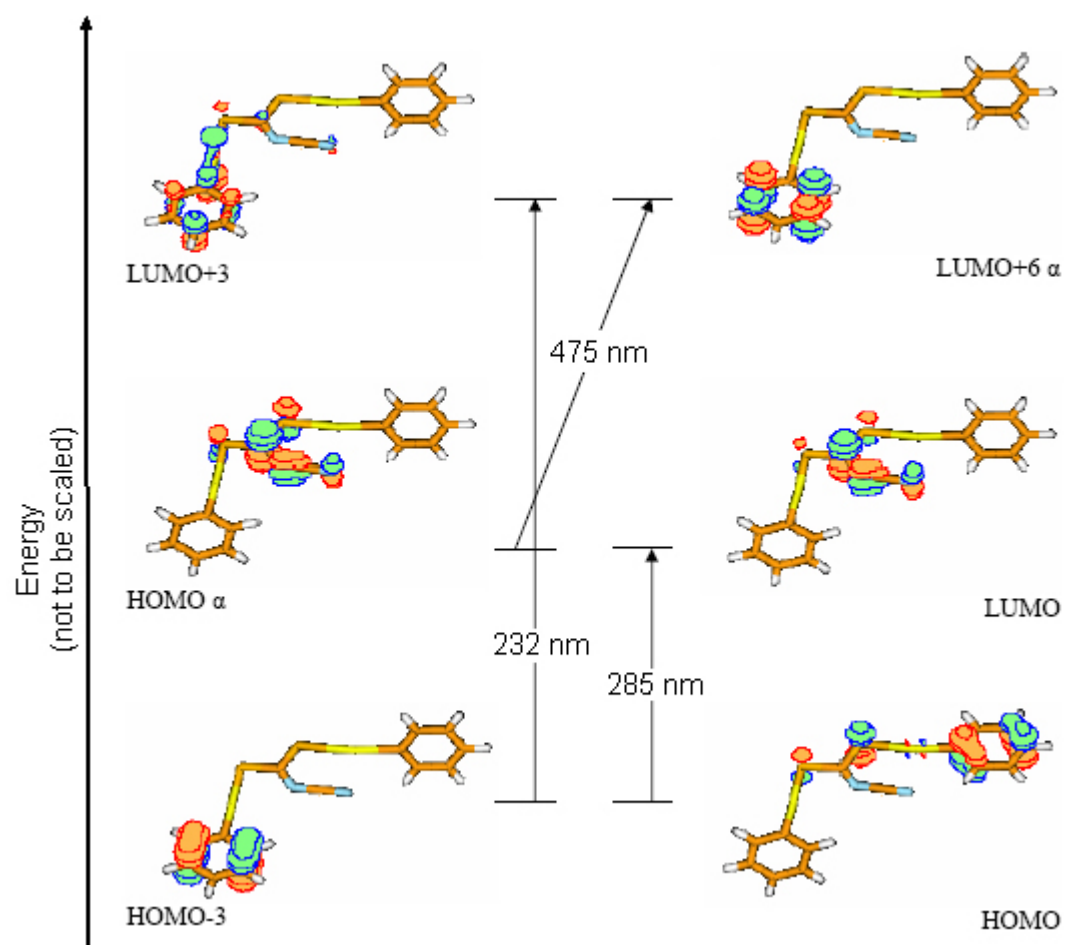

**Fig S3.** Selected orbital transitions for **6** (orbital counter values are 0.05)
